# Supplementary material for: Molecular Structure, Luminescent and DFT Computational Studies of Two Novel Europium(III) &beta;-diketonate Complexes
Source: Preprints.org preprint supplement (doi:10.20944/preprints201701.0031.v1), 2017-01-06
Supplement: Supplementary file 1 [file Supplementary Materials.doc]

Supplementary Materials: Molecular Structure, Luminescent and DFT Computational Studies of a Novel Europium(III) β-diketonate Complex

Haifeng Shao 1, Yanjun Hou 1,*, Jinyuan Bai 1, and Haijun Niu 2,*

1 School of Chemistry and Materials Science, Heilongjiang University, Harbin 150080,P. R. China; houyj@hlju.edu.cn

2 Key Laboratory of Chemical Engineering Process and Technology for High-efficiency Conversion, College of Heilongjiang Province, Harbin 150080, P. R. China; haijunniu@hotmail.com

***** Correspondence: houyj@hlju.edu.cn (Y.H.); haijunniu@hotmail.com (H.N.);

Tel.: +86-451-86609135 (Y.H. & H.N.)


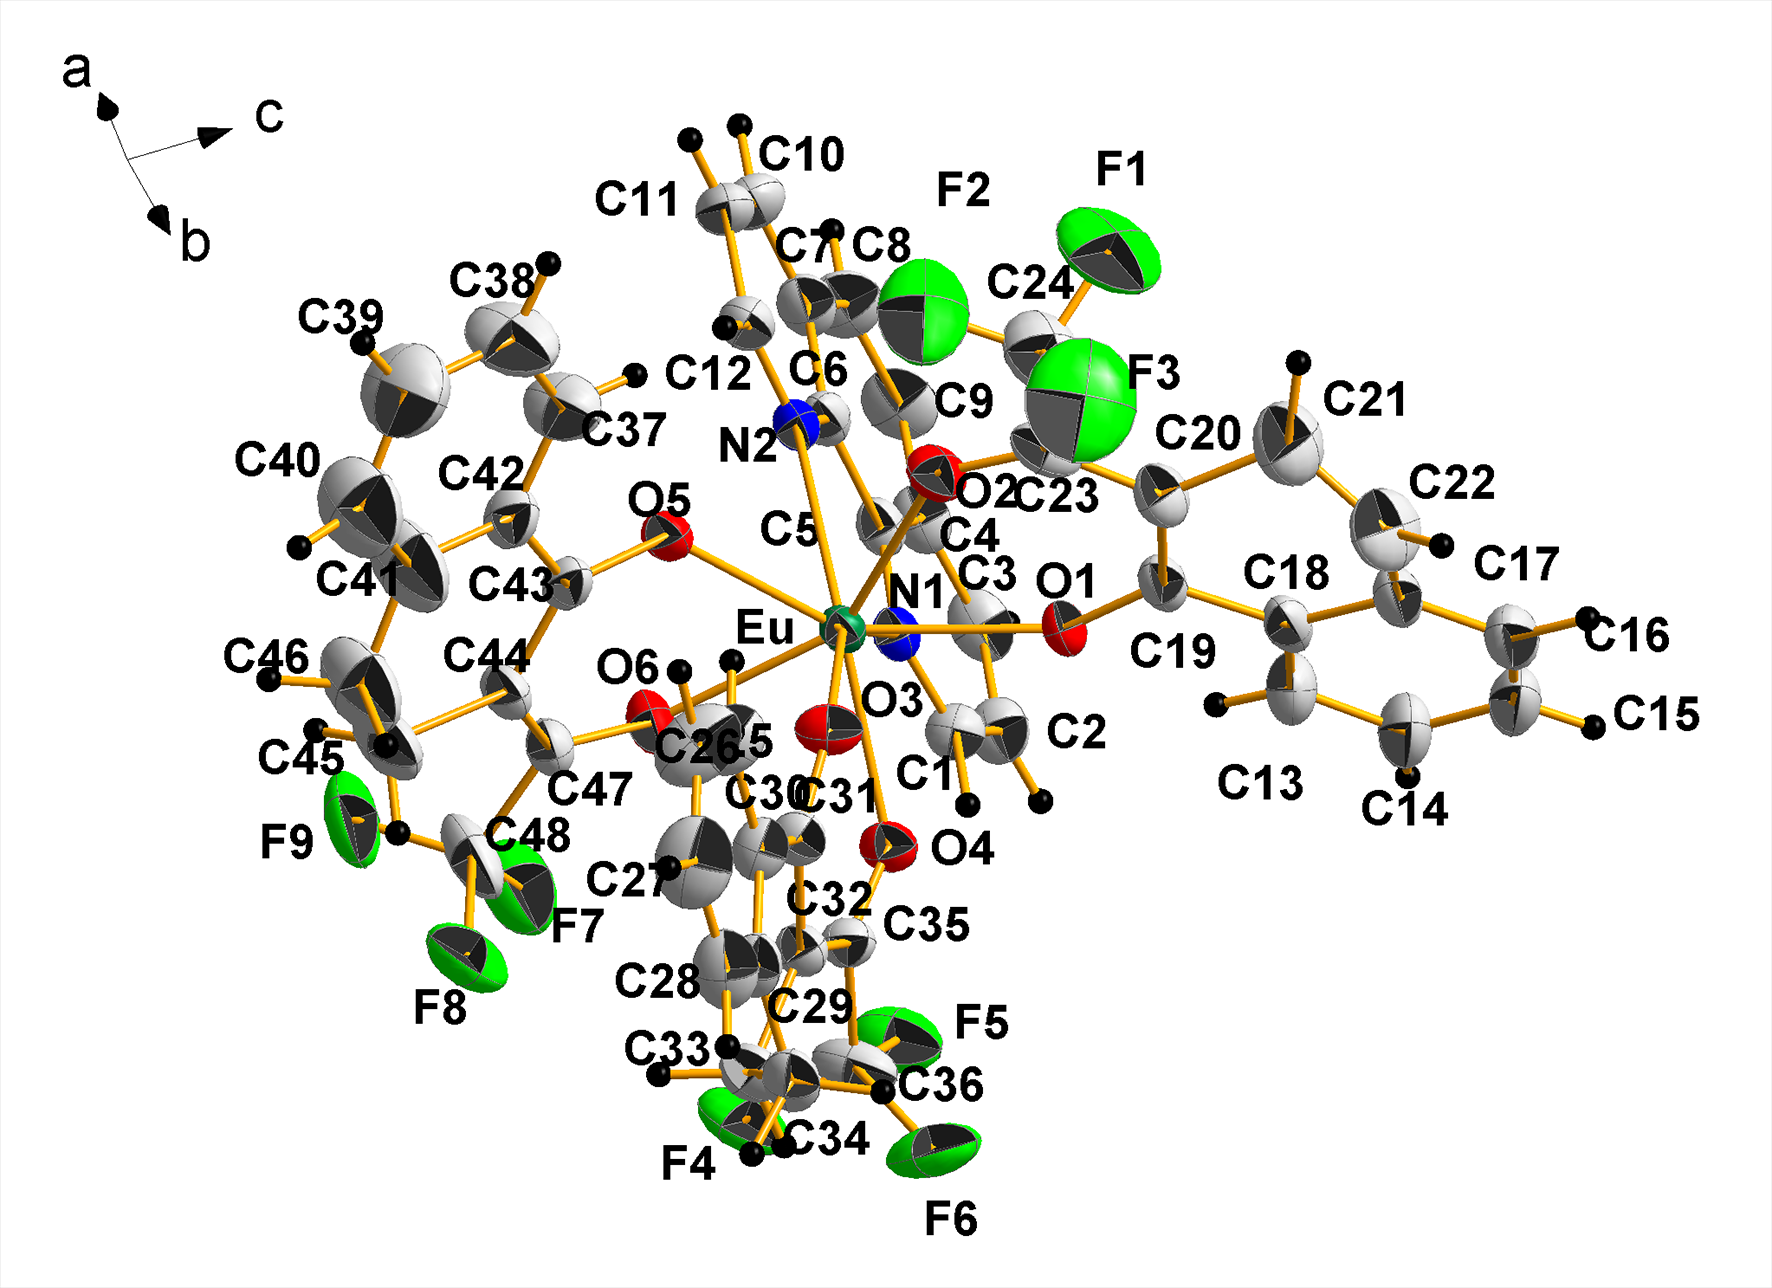


**Figure S1.** Crystal structure of complex **1**

**Table S1.** Selected bond lengths (Å) and angles (°) for complex **1**

| **Bond angles** | |
| --- | --- |
| O(3)-Eu(1)-O(1) | 98.95(15) |
| O(3)-Eu(1)-O(4) | 69.50(14) |
| O(1)-Eu(1)-O(4) | 77.82(14) |
| O(3)-Eu(1)-O(2) | 79.99(16) |
| O(1)-Eu(1)-O(2) | 68.96(16) |
| O(4)-Eu(1)-O(2) | 130.18(16) |
| O(3)-Eu(1)-O(5) | 74.43(16) |
| O(1)-Eu(1)-O(5) | 145.76(15) |
| O(4)-Eu(1)-O(5) | 127.46(14) |
| O(2)-Eu(1)-O(5) | 76.79(16) |
| O(3)-Eu(1)-O(6) | 91.90(16) |
| O(1)-Eu(1)-O(6) | 145.14(15) |
| O(4)-Eu(1)-O(6) | 75.21(16) |
| O(2)-Eu(1)-O(6) | 145.86(17) |
| O(5)-Eu(1)-O(6) | 69.09(15) |
| O(3)-Eu(1)-N(2) | 146.16(16) |
| O(1)-Eu(1)-N(2) | 97.53(14) |
| O(4)-Eu(1)-N(2) | 143.31(17) |
| O(2)-Eu(1)-N(2) | 78.69(17) |
| O(5)-Eu(1)-N(2) | 75.31(16) |
| O(6)-Eu(1)-N(2) | 91.20(16) |
| O(3)-Eu(1)-N(1) | 150.73(16) |
| O(1)-Eu(1)-N(1) | 71.38(14) |
| O(4)-Eu(1)-N(1) | 81.35(15) |
| O(2)-Eu(1)-N(1) | 119.20(16) |
| O(5)-Eu(1)-N(1) | 128.91(16) |
| O(6)-Eu(1)-N(1) | 83.02(15) |
| N(2)-Eu(1)-N(1) | 63.02(17) |
| C(1)-N(1)-Eu(1) | 122.1(4) |
| C(5)-N(1)-Eu(1) | 119.5(4) |
| C(12)-N(2)-Eu(1) | 121.8(5) |
| C(6)-N(2)-Eu(1) | 120.4(4) |
| C(19)-O(1)-Eu(1) | 140.5(5) |
| C(23)-O(2)-Eu(1) | 136.5(5) |
| C(31)-O(3)-Eu(1) | 136.9(4) |
| C(35)-O(4)-Eu(1) | 132.0(4) |
| C(43)-O(5)-Eu(1) | 131.9(4) |
| C(47)-O(6)-Eu(1) | 131.1(5) |

**Table S2**. Hydrogen bond lengths/Å and bond angles/°for complex **1**.

| **D-H...A** | **d(D-H)** | **d(H...A)** | **d(D...A)** | **<(DHA)** |
| --- | --- | --- | --- | --- |
| C(21)-H(21)...F(1) | 0.93 | 2.36 | 2.892(16) | 115.7 |
| C(33)-H(33B)...F(4) | 0.97 | 2.46 | 2.934(10) | 110.0 |
| C(33)-H(33B)...F(6) | 0.97 | 2.38 | 3.078(9) | 128.8 |
| C(45)-H(45B)...F(8) | 0.97 | 2.41 | 2.981(13) | 116.8 |
| C(45)-H(45A)...F(9) | 0.97 | 2.36 | 2.872(12) | 112.2 |
| C(13)-H(13)...O(1) | 0.93 | 2.43 | 2.742(9) | 99.8 |
| C(1)-H(1)...O(4) | 0.93 | 2.56 | 3.203(8) | 127.1 |
| C(37)-H(37)...O(5) | 0.93 | 2.40 | 2.727(10) | 100.4 |
| C(12)-H(12)...O(5) | 0.93 | 2.47 | 3.036(8) | 119.1 |


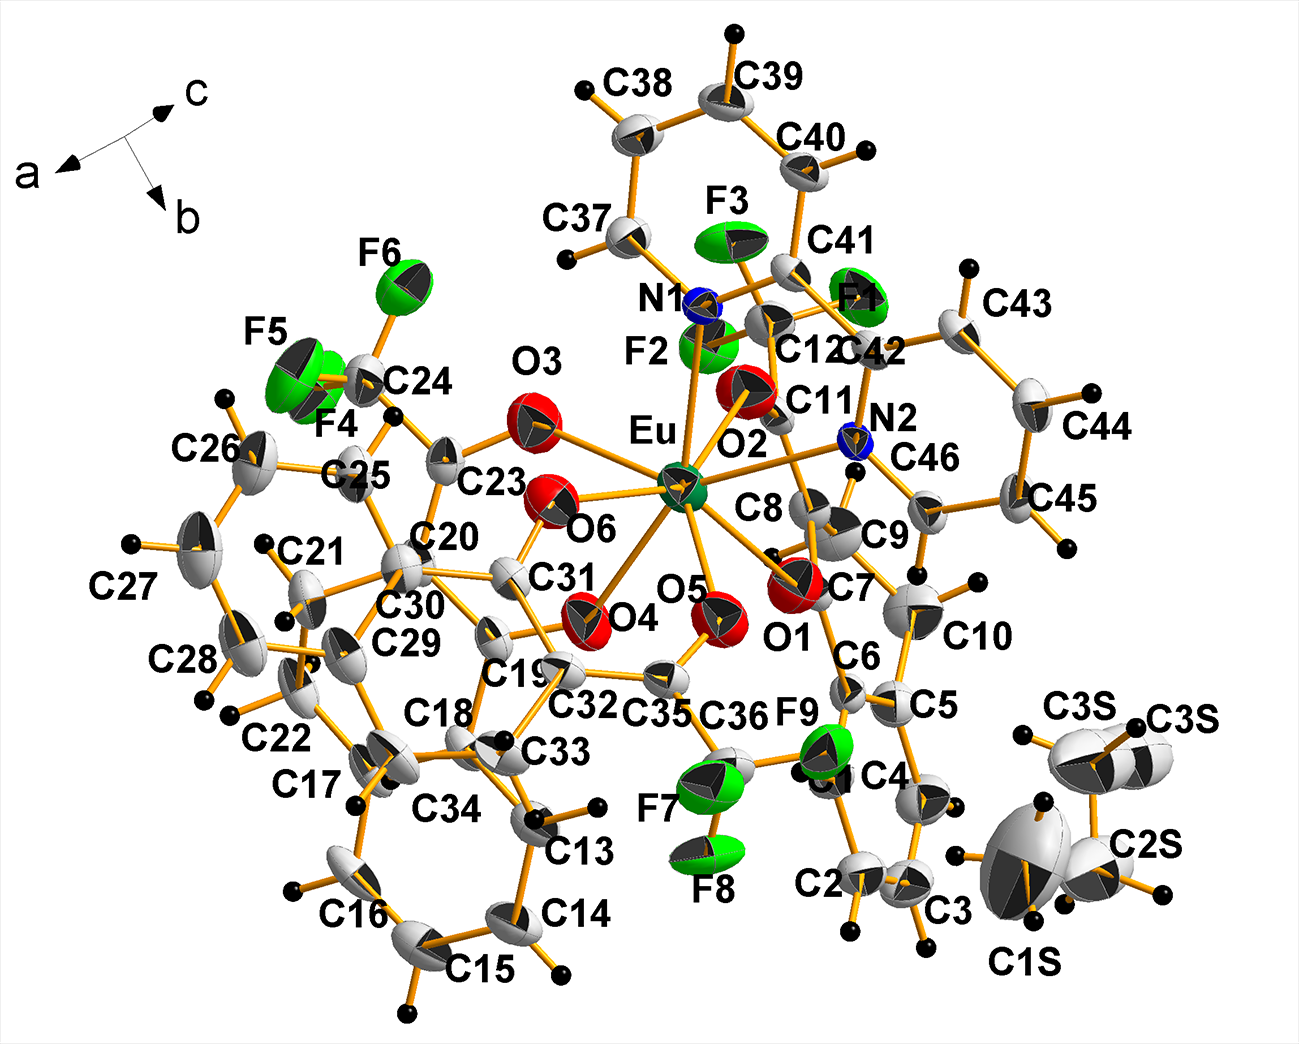


**Figure S2.** Crystal structure of complex **2**

**Table S3.** Selected bond lengths (Å) and angles (°) for complex **2**

| **Bond angles** | |
| --- | --- |
| O(1)-Eu(1)-O(4) | 73.41(10) |
| O(1)-Eu(1)-O(5) | 79.39(10) |
| O(4)-Eu(1)-O(5) | 79.10(10) |
| O(1)-Eu(1)-O(3) | 118.31(10) |
| O(4)-Eu(1)-O(3) | 69.89(9) |
| O(5)-Eu(1)-O(3) | 136.12(10) |
| O(1)-Eu(1)-O(2) | 69.14(9) |
| O(4)-Eu(1)-O(2) | 106.62(10) |
| O(5)-Eu(1)-O(2) | 144.22(10) |
| O(3)-Eu(1)-O(2) | 76.15(10) |
| O(1)-Eu(1)-O(6) | 142.17(9) |
| O(4)-Eu(1)-O(6) | 79.82(10) |
| O(5)-Eu(1)-O(6) | 69.55(9) |
| O(3)-Eu(1)-O(6) | 74.92(10) |
| O(2)-Eu(1)-O(6) | 145.87(10) |
| O(1)-Eu(1)-N(1) | 130.13(10) |
| O(4)-Eu(1)-N(1) | 152.94(10) |
| O(5)-Eu(1)-N(1) | 114.89(10) |
| O(3)-Eu(1)-N(1) | 85.18(11) |
| O(2)-Eu(1)-N(1) | 76.14(10) |
| O(6)-Eu(1)-N(1) | 83.75(10) |
| O(1)-Eu(1)-N(2) | 78.86(10) |
| O(4)-Eu(1)-N(2) | 143.96(10) |
| O(5)-Eu(1)-N(2) | 73.49(10) |
| O(3)-Eu(1)-N(2) | 145.41(10) |
| O(2)-Eu(1)-N(2) | 83.88(10) |
| O(6)-Eu(1)-N(2) | 110.94(10) |
| N(1)-Eu(1)-N(2) | 62.53(11) |
| C(37)-N(1)-Eu(1) | 119.7(3) |
| C(41)-N(1)-Eu(1) | 122.1(3) |
| C(46)-N(2)-Eu(1) | 119.5(3) |
| C(42)-N(2)-Eu(1) | 121.7(3) |
| C(7)-O(1)-Eu(1) | 134.8(2) |
| C(11)-O(2)-Eu(1) | 133.6(3) |
| C(23)-O(3)-Eu(1) | 131.0(3) |
| C(19)-O(4)-Eu(1) | 136.0(3) |
| C(35)-O(5)-Eu(1) | 133.8(3) |
| C(31)-O(6)-Eu(1) | 131.6(2) |

**Table S4. Hydrogen bond lengths/Å and bond angles/°for complex 2**

| **D-H...A** | **d(D-H)** | **d(H...A)** | **d(D...A)** | **<(DHA)** |
| --- | --- | --- | --- | --- |
| C(33)-H(33A)...F(8) | 0.97 | 2.50 | 3.192(7) | 128.2 |
| C(33)-H(33A)...F(7) | 0.97 | 2.55 | 2.882(7) | 100.3 |
| C(21)-H(21A)...F(5) | 0.97 | 2.47 | 3.039(7) | 116.8 |
| C(21)-H(21A)...F(4) | 0.97 | 2.38 | 3.068(7) | 127.2 |
| C(9)-H(9B)...F(1) | 0.97 | 2.46 | 3.153(7) | 127.9 |

**
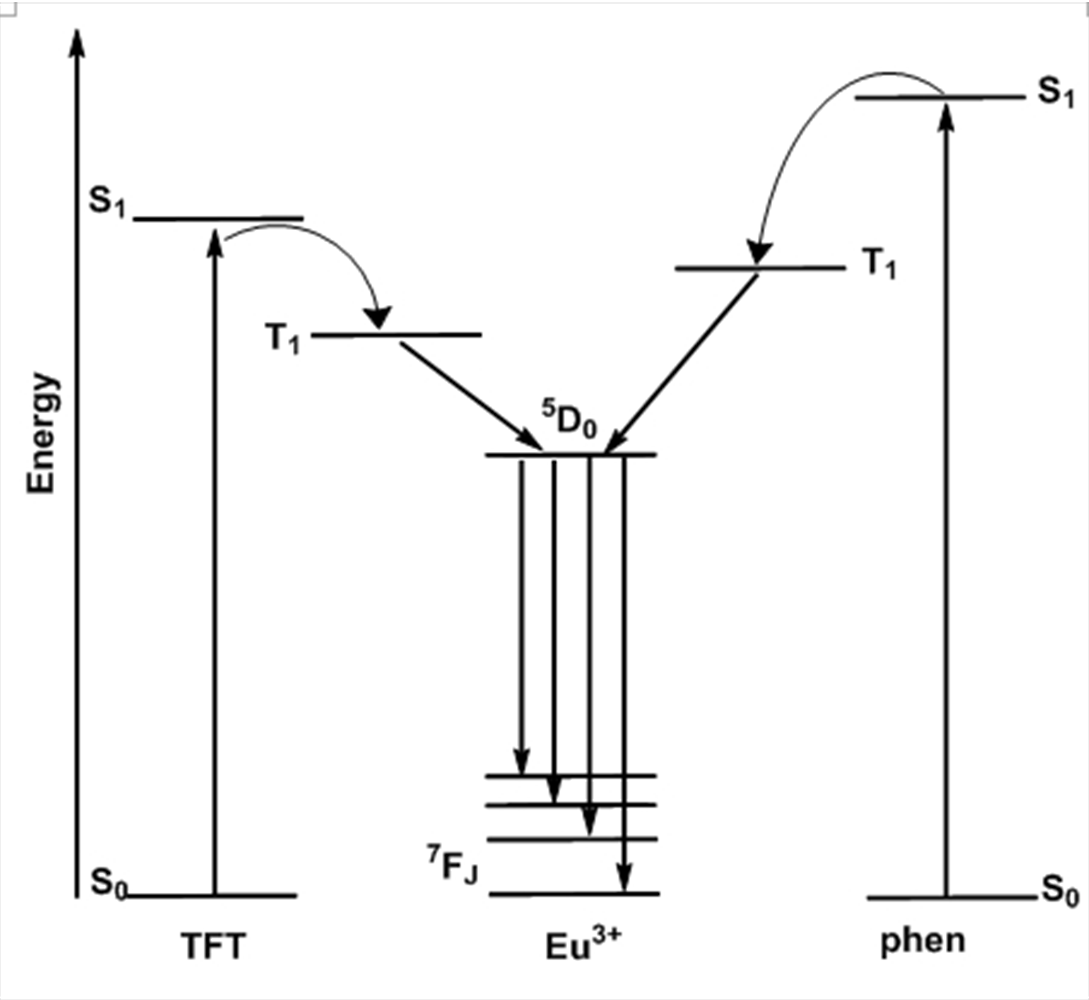
**

**Figure S3. Schematic energy level diagram for complex 1. S, excited singlet state; T, excited triplet state.**

| 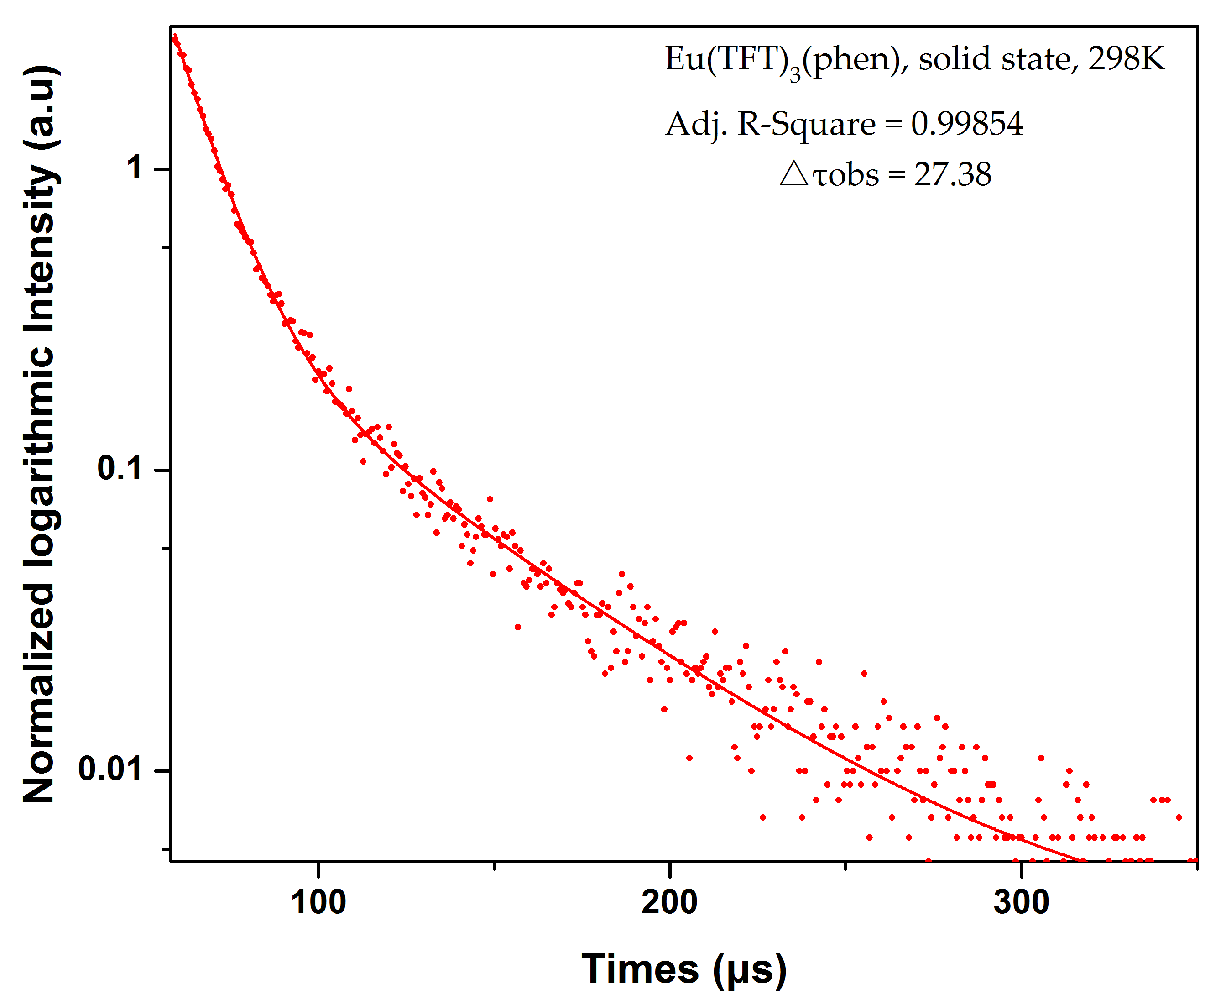  (**a**) | 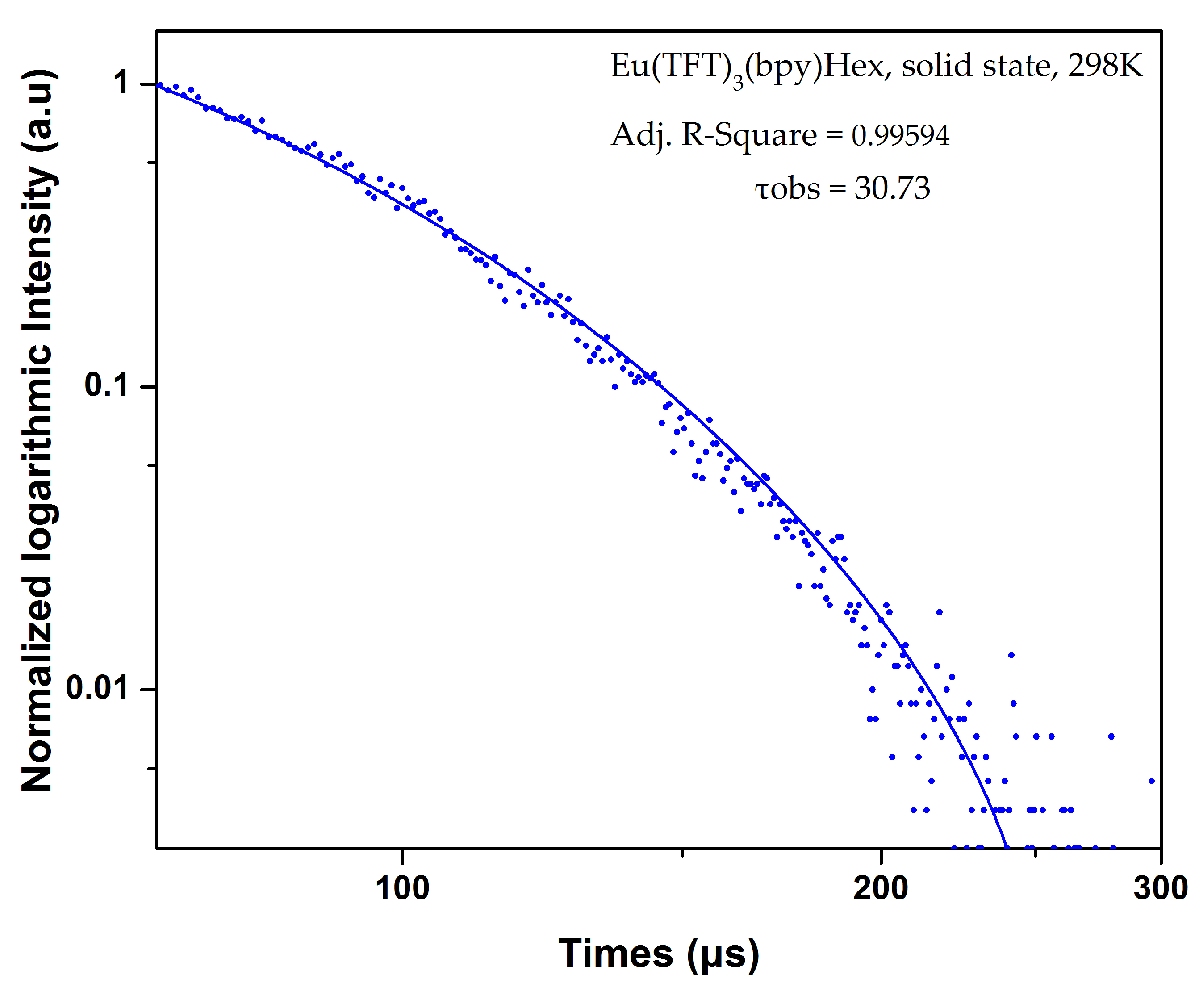  (**b**) |
| --- | --- |

**Figure S4.** Luminescence decay profiles for complex **1** (a) and **2** (b) in solid-state were measured at 298K.


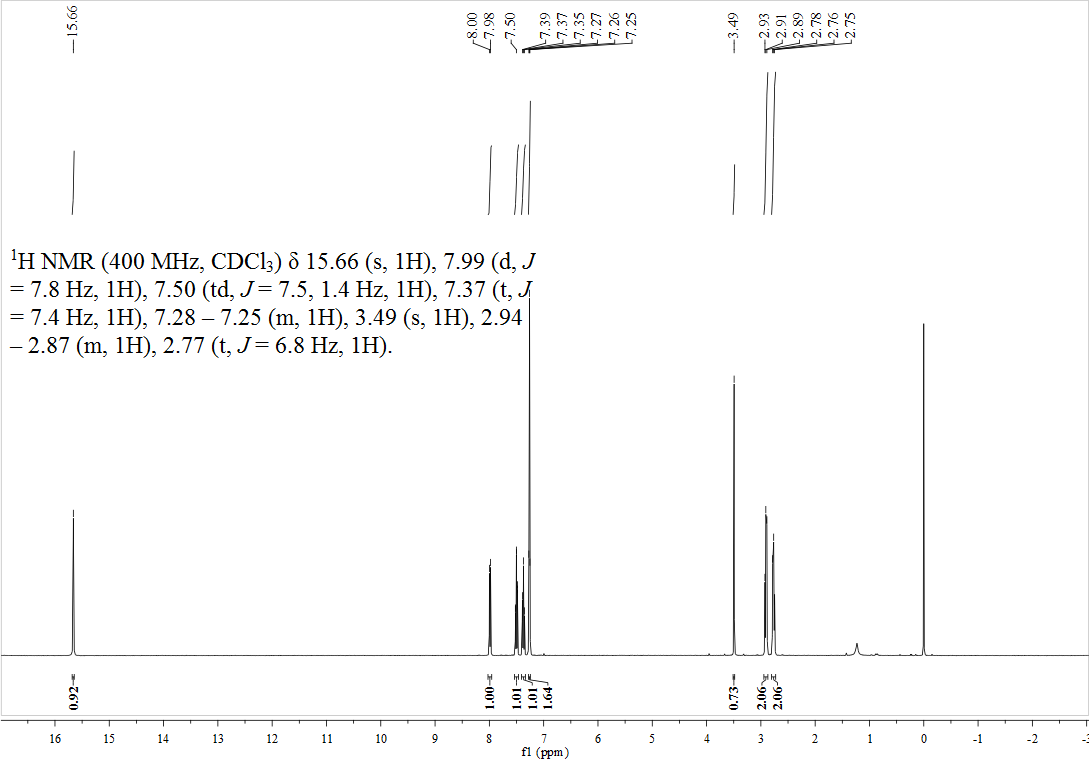


**Figure S5.** 1H NMR analysis of 2-(2,2,2-trifluoroethyl)-1-tetralone.


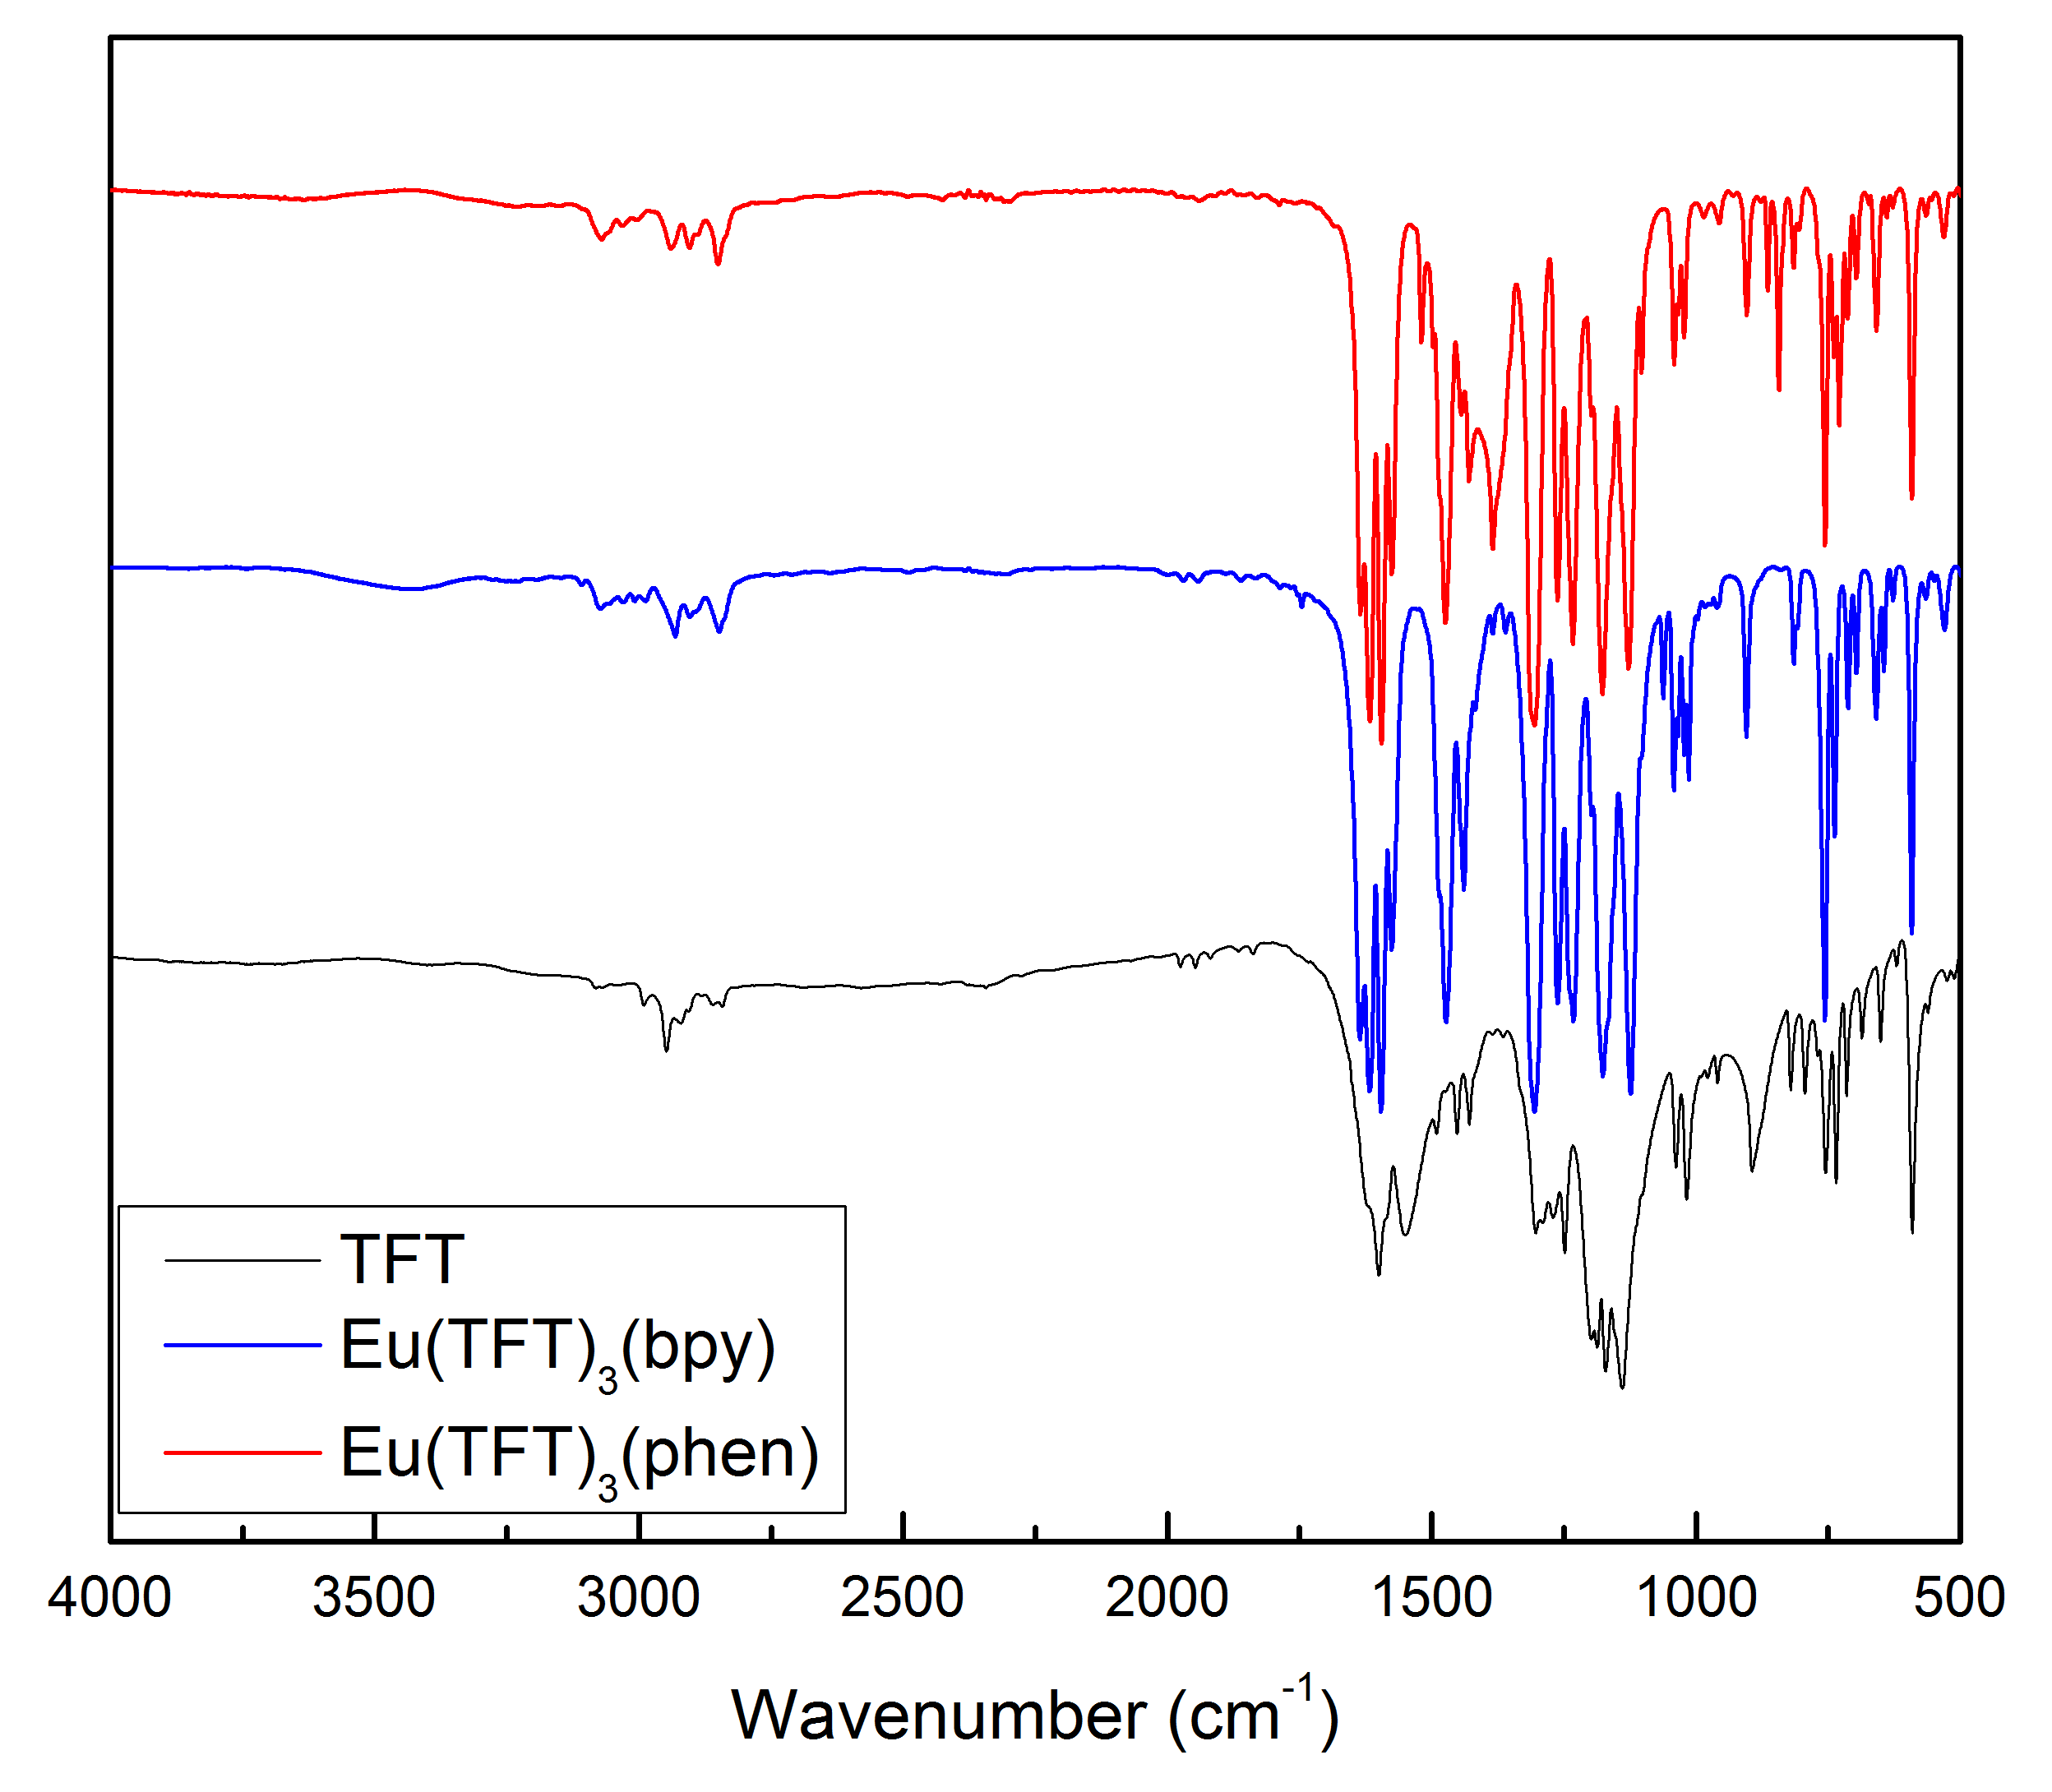


Figure S6. FT-IR spectra of TFT and complexes 1-2.

© 2016 by the authors. Submitted for possible open access publication under the
terms and conditions of the Creative Commons Attribution (CC-BY) license (http://creativecommons.org/licenses/by/4.0/).
